# Supplementary material
Source: PubMed Central journal article supplement (PMC2823541)
Supplement: supp_M109.034421_jbc.M109.034421-1.pdf [file supp_M109.034421_jbc.M109.034421-1.pdf]

## **SUPPLEMENTAL DATA**

### **INTRACELLULAR SHUTTTLING AND MITOCHONDRIAL FUNCTION OF THIOREDOXIN-INTERACTING PROTEIN**

Geetu Saxena, Junqin Chen and Anath Shalev

#### Table of Contents

Supplemental Figure S1

Supplemental Figure S2

Supplemental Figure S3

Supplemental Figure S4

Supplemental Figure S5

Supplemental Figure S6

**INS-LacZ**

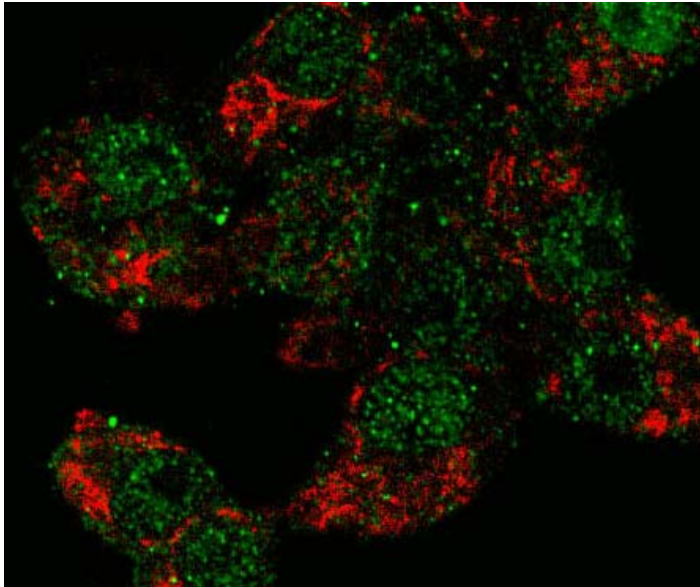

**MitoTracker – TXNIP**

**INS-TXNIP**

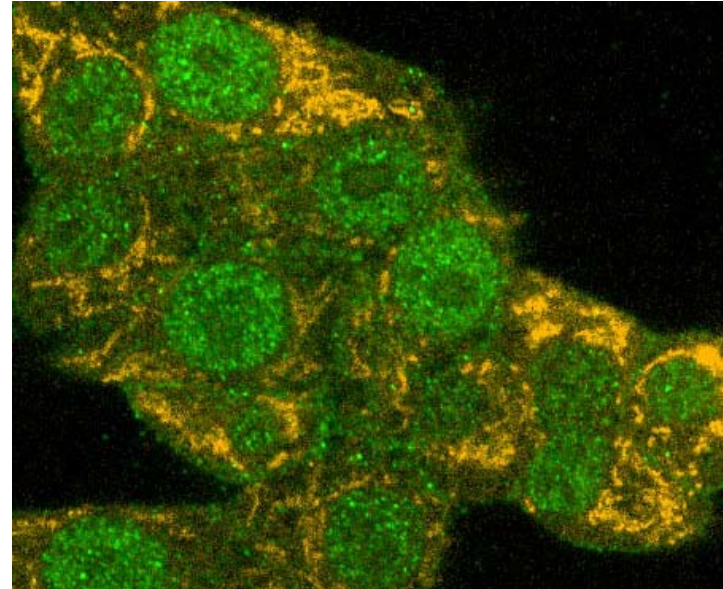

**MitoTracker – TXNIP**

**Figure S1:** Immunohistochemistry using the JY2 anti-TXNIP antibody as described in the Experimental Procedures comparing control INS-LacZ and TXNIP-overexpressing INS-TXNIP cells.

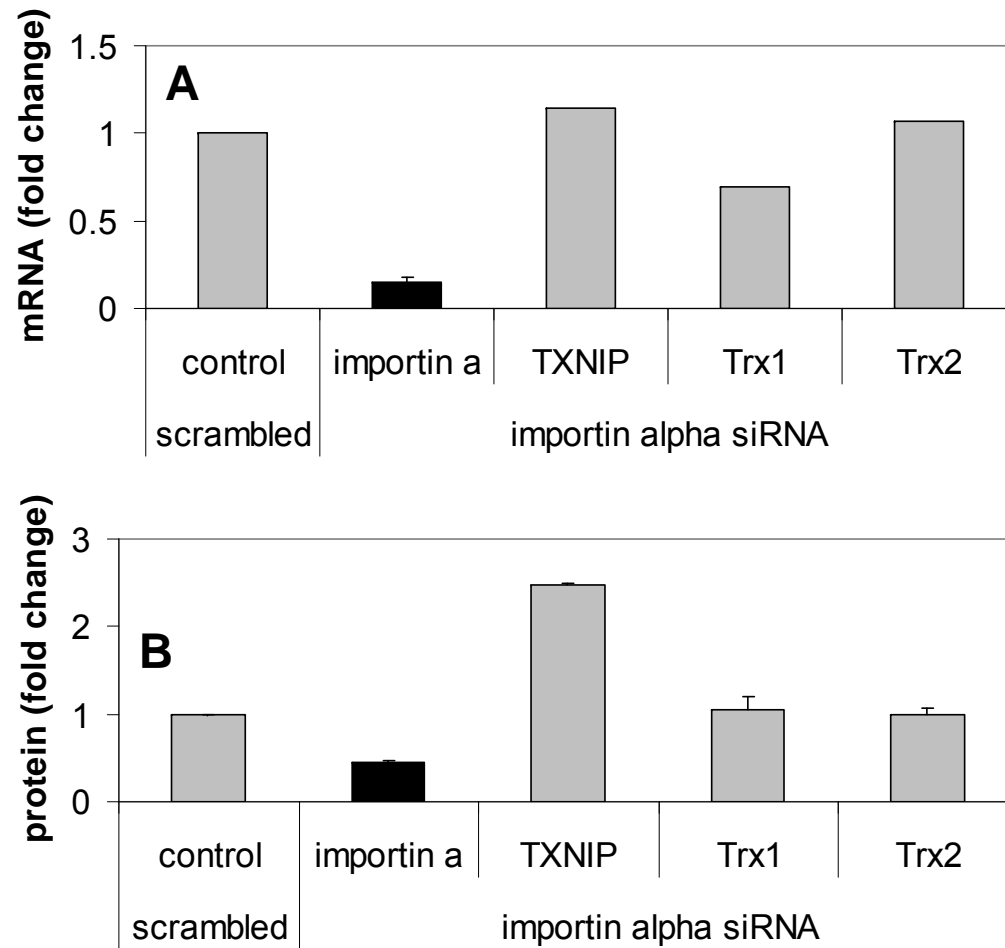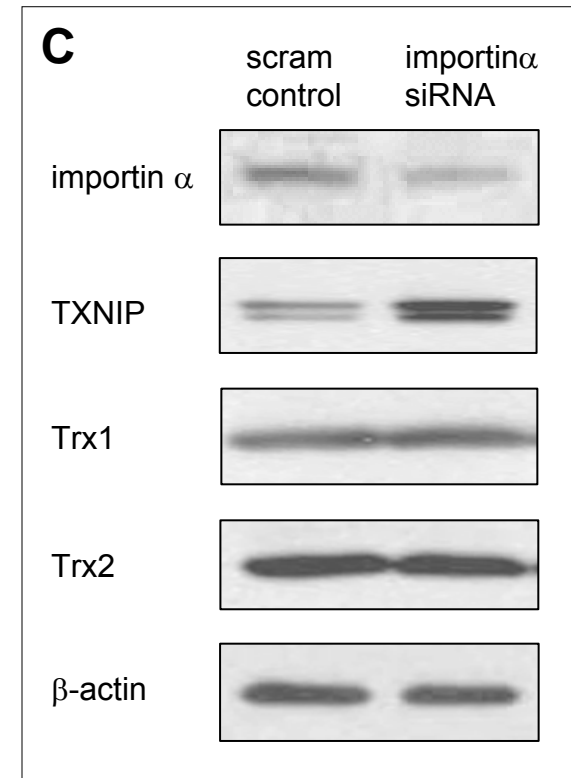

**Figure S2:** Demonstration of specific importin- $\alpha$ 1 knockdown in INS-1 cells as compared to scrambled siRNA at the mRNA (**A**) and at the protein level (**B-C**).

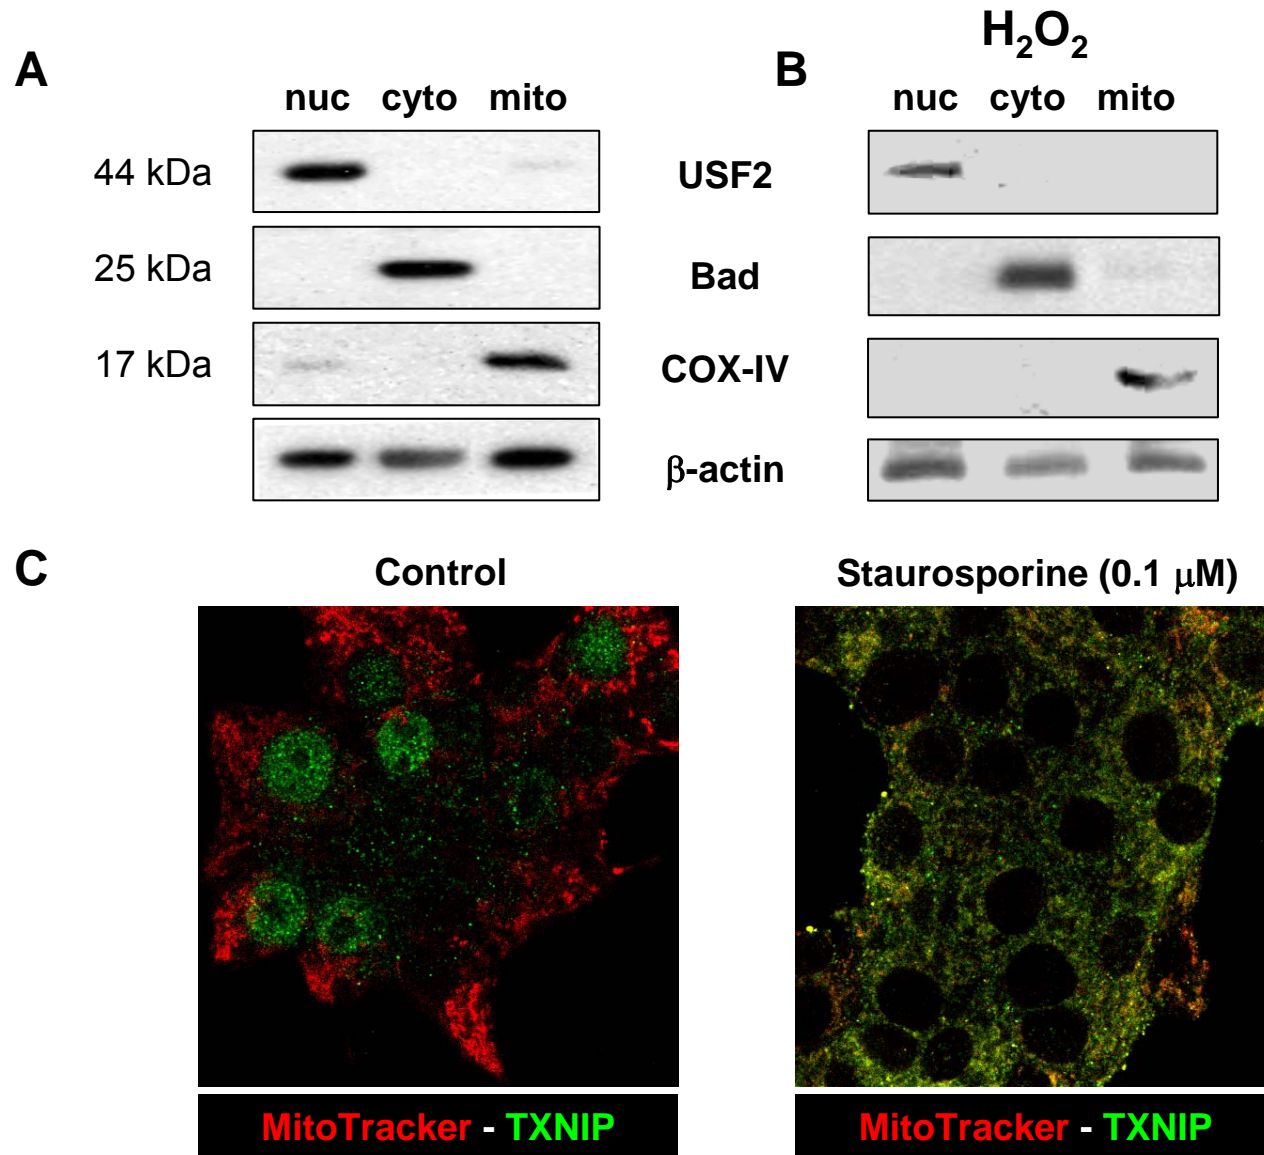

**Figure S3:** Confirmation of appropriate subcellular fractionation under control (A) and oxidative stress conditions (B). Confocal microscopy demonstrating TXNIP shuttling in response to staurosporin (C).

**Ad Fig. 3A:**

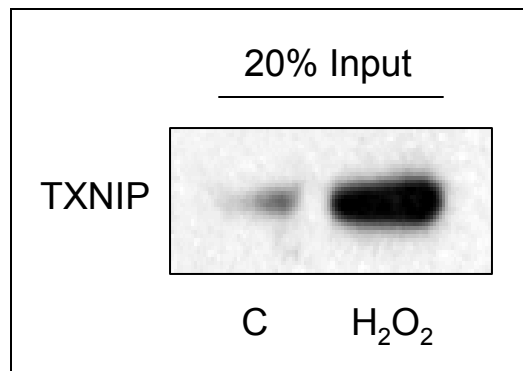

**Ad Fig. 6A:**

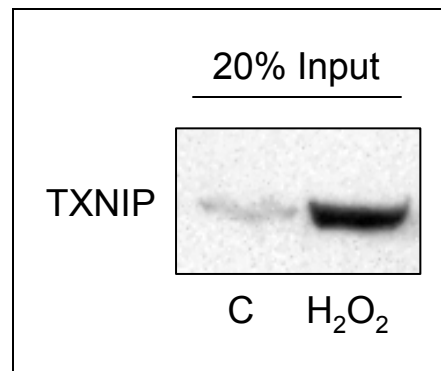

**Ad Fig. 6B:**

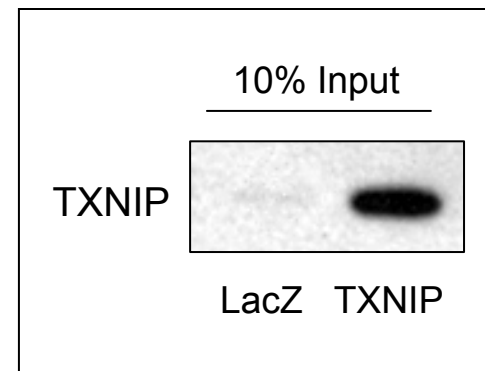

**Figure S4:** TXNIP input as measured by immunoblotting of mitochondrial fractions used for the co-immunoprecipitation experiments shown in Fig. 3A and 6A-B.

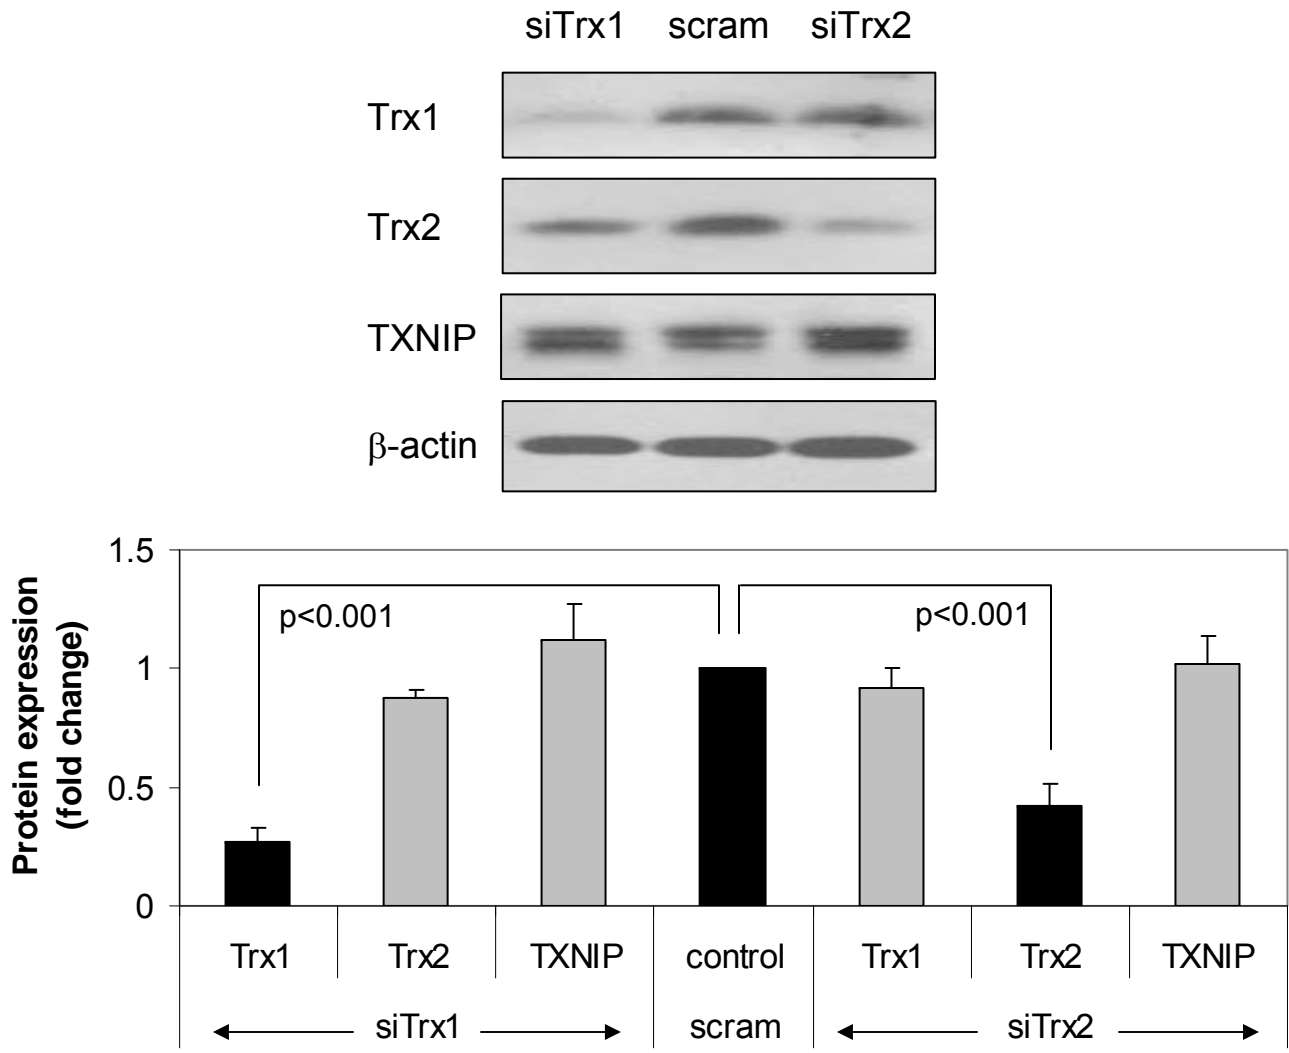

**Figure S5:** Specific knock down of thioredoxin 1 (with siTrx1) or 2 (with siTrx2) as shown by immunoblotting in INS-1 cells and compared to scrambled control.

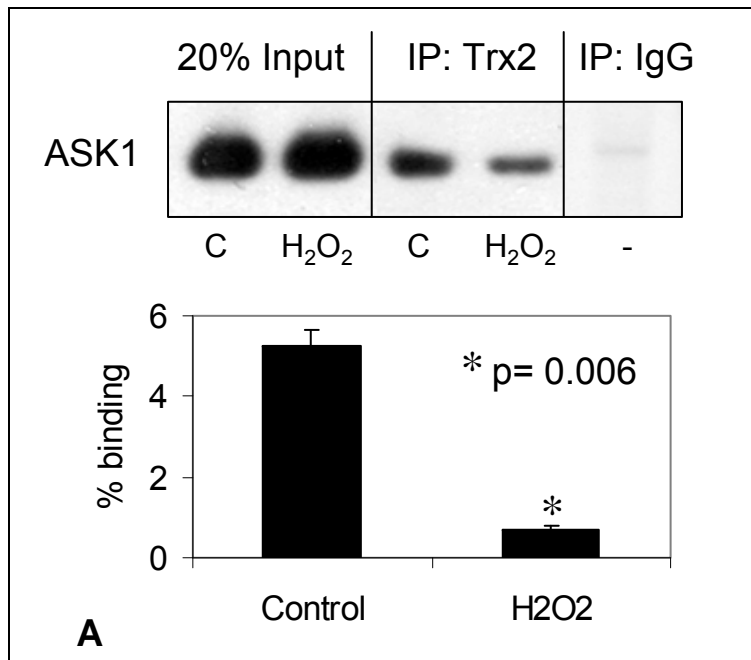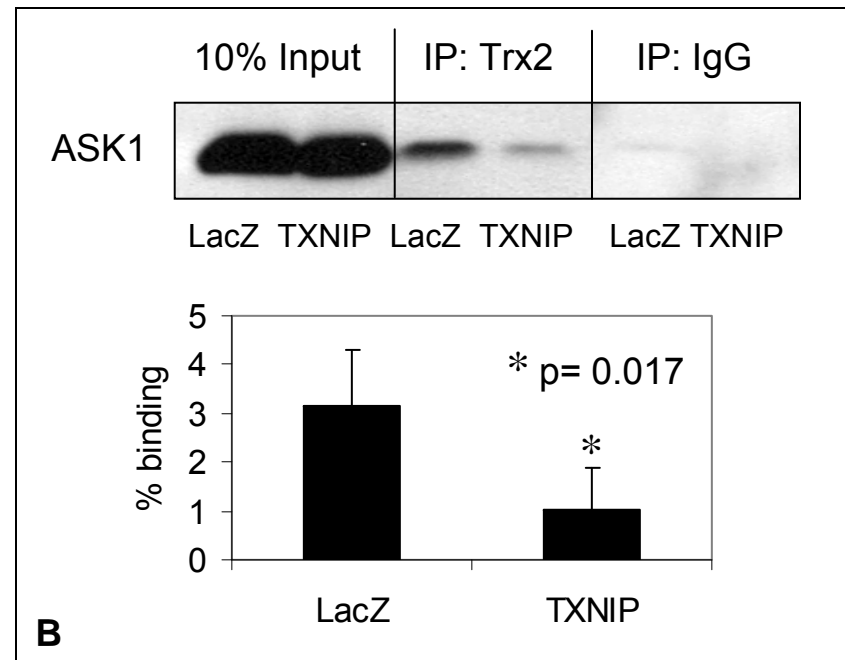

**Figure S6:** Trx2-ASK1 binding in response to oxidative stress **(A)** or TXNIP overexpression **(B)** as assessed by immunoprecipitation with thioredoxin 2. Bars represent means  $\pm$ SEM of 3 independent experiments.
